# Supplementary material for: Surface plasmons in quantum-sized noble-metal clusters: TDDFT quantum calculations and the classical picture of charge oscillations
Source: Royal Society of Chemistry journal article supplement (doi:10.1039/c5cp01177a), 2015-01-01
Supplement: c5cp01177a1.pdf [file c5cp01177a1.pdf]

Supporting Information – PCCP (2015), DOI: 10.1039/c5cp01177a

# Surface plasmons in quantum-sized noble-metal clusters: TDDFT quantum calculations and the classical picture of charge oscillations

**Hans-Christian Weissker**\*<sup>1,2</sup> and Xóchitl López-Lozano<sup>3</sup>

<sup>1</sup>*Aix Marseille University, CNRS, CInAM UMR 7325, 13288, Marseille, France,*

<sup>2</sup>European Theoretical Spectroscopy Facility  
[www.etsf.eu](http://www.etsf.eu)

<sup>3</sup>Department of Physics & Astronomy, The University of Texas at San Antonio, One UTSA circle, 78249-0697 San Antonio, TX., USA

[weissker@cinam.univ-mrs.fr](mailto:weissker@cinam.univ-mrs.fr)

# Icosahedra Ag<sub>147</sub> and Au<sub>147</sub>

Ag<sub>147</sub>

Au<sub>147</sub>

**Animation A:** Isosurfaces of the difference between time-dependent density and ground state density  $\rho(\mathbf{r}, t) - \rho_{\text{gs}}(\mathbf{r})$ , at a value of  $1 \times 10^{-5} \text{ \AA}^{-3}$ , corresponding to Fig. 2 of the article: Icosahedral Ag<sub>147</sub> (left) and Au<sub>147</sub> (right). For Ag<sub>147</sub>, one period of the approximately periodic movement is shown, whereas for Au<sub>147</sub>, a relatively arbitrary interval was chosen out of the entirely non-periodic dynamics. The shown interval starts after about 25 fs of time evolution (see Fig. 2 of the article).



## Nanorods Ag<sub>37</sub> and Au<sub>37</sub>

Ag<sub>37</sub>

Au<sub>37</sub>

**Animation B:** Time-dependent density  $\rho(\mathbf{r}, t) - \rho_{\text{gs}}(\mathbf{r})$ , at a value of  $1 \times 10^{-4} \text{ \AA}^{-3}$ , corresponding to Fig. 3 of the article: pentagonal nanorods Ag<sub>37</sub> (left) and Au<sub>37</sub> (right). For Ag<sub>37</sub>, one period of the approximately periodic movement is shown, whereas for Au<sub>37</sub>, a relatively arbitrary interval was chosen out of the entirely non-periodic dynamics. The shown interval starts after about 25 fs of time evolution. Red = positive, blue = negative difference  $\rho(\mathbf{r}, t) - \rho_{\text{gs}}(\mathbf{r})$ .

## Monatomic chain Ag<sub>7</sub>

**Animation C:** Time-dependent density corresponding to Fig. 5 of the article: monatomic chains Ag<sub>7</sub> for an excitation along the axis (left) and perpendicular to the axis of the chain (right). Shown is the difference between time-dependent density and ground-state density  $\rho(\mathbf{r}, t) - \rho_{\text{gs}}(\mathbf{r})$  (red = positive, blue = negative), at a value of  $1 \times 10^{-5} \text{ \AA}^{-3}$ .

## Screening by d electrons: rod Ag<sub>37</sub>

**Animation D:** Time-dependent density corresponding to Fig. 6 of the article: pentagonal nanorod Ag<sub>37</sub> for an excitation along the axis for different isovalues as indicated, in units of Å<sup>-3</sup>.

## Comparison Ag vs. Na (no d electrons)

**Animation E:** Time-dependent density corresponding to Fig. 7 of the article: pentagonal nanorod Ag<sub>37</sub> for an excitation along the axis for different isovalues as indicated, in units of  $\text{\AA}^{-3}$ , compared with a 216-atom sodium rod.
